# Supplementary material
Source: publisher site journal article supplement (https://static.cambridge.org/content/id/urn:cambridge.org:id:article:S0265051720000091/resource/name/S0265051720000091supp001.docx)
Supplement: Supplementary file 1 [file S0265051720000091supp001.docx]

**Online supplementary material**

**File 1: Semi-structured interview questions**

1. Please tell me a story about:

a. Your first experience of Dalcroze.

b. Your favourite lesson, if you have one.

c. Your most challenging lesson, if you have one.

d. A treasured memory from your Dalcroze experiences to date, if you have one.

2. Could you please tell me a story about how Dalcroze fits into your life journey to date?

(temporality / past-present-future)

3. Can you tell me a story about a Dalcroze class when you were aware of where you were

learning? (spatiality / space, place, situation)

4. Can you tell me a story about a time when you connected to someone else, or a group of

others, in a Dalcroze class? (relationality / interaction)

5. Can you tell me a story about becoming aware of your own body in a Dalcroze class?

(corporeality)

6. Can you tell me a story about a time when you had:

a. An aesthetic experience during a Dalcroze class?

b. A transcendent experience during a Dalcroze class?

c. or a sacred or spiritual experience during a Dalcroze class?

**File 2: Narrative coding scheme**

**Continuity**_past

Continuity_future

Continuity_present

Continuity_time

Evaluation_so what

**Interaction**_institutional

Interaction_personal_assumptions

Interaction_personal_beliefs

Interaction_personal_cultural

*Interaction_personal_identity*

Interaction_personal_values

Interaction_social

Interaction_personal_transformation

Plot_action

Plot_big story

Plot_body

Plot_characters

Plot_complicating action_what happened

Plot_experiences

*Plot_problem*

*Plot_resolution*

Plot_scene and setting (situation_place)

Plot_setting_environment

*Plot_significant moments*

Plot_small story

**Situation**_place_setting

Storyline_climax

Storyline_conflict

Storyline_turning point

Storyline_contradictions

Types of stories_confessional

Types of stories_epiphany

Types of stories_quest

Types of stories_survivor
